# Supplementary material for: Data quality control and tools in passive seismic experiments exemplified on the Czech broadband seismic pool MOBNET in the AlpArray collaborative project
Source: Copernicus journal article supplement (doi:10.5194/gi-6-505-2017), 2017-12-04
Supplement: Supplementary file 1 [file gi-6-505-2017-supplement.zip]

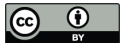

## *Supplement of*

# **Data quality control and tools in passive seismic experiments exemplified on the Czech broadband seismic pool MOBNET in the AlpArray collaborative project**

**Luděk Vecsey et al.**

*Correspondence to:* Luděk Vecsey (vecsey@ig.cas.cz)

- gi-6-505-2017-supplement-title-page.pdf
- S10\_EASI\_CZctEN 11.pdf
- S11\_EASI\_CZctEN 12.pdf
- S12\_EASI\_CZctEN 13.pdf
- S13\_EASI\_CZctEN 14.pdf
- S14\_EASI\_CZctEN 15.pdf
- S15\_EASI\_CZctEN 16.pdf
- S16\_EASI\_CZctEN 17.pdf
- S17\_EASI\_CZctEN 18.pdf
- S18\_EASI\_CZctEN 19.pdf
- S19\_EASI\_CZctEN 20.pdf
- S1\_EASI\_CZctEN 1.pdf
- S20\_AlpArrayCZctEN 71.pdf
- S21\_AlpArrayCZctEN 72.pdf
- S22\_AlpArrayCZctEN 73.pdf
- S23\_AlpArrayCZctEN 74.pdf
- S24\_AlpArrayCZctEN 75.pdf
- S25\_AlpArrayCZctEN 77.pdf
- S26\_AlpArrayCZctEN 78.pdf

- S27\_AlphabetArrayCZctEN 79.pdf
- S28\_AlphabetArrayCZctEN 80.pdf
- S29\_AlphabetArrayCZctEN 81.pdf
- S2\_EASI\_CZctEN 2.pdf
- S30\_AlphabetArrayCZctEN 82.pdf
- S31\_AlphabetArrayCZctEN 83.pdf
- S32\_AlphabetArrayCZctEN 84.pdf
- S33\_AlphabetArrayCZctEN 85.pdf
- S34\_AlphabetArrayCZctEN 86.pdf
- S35\_AlphabetArrayCZctEN 87.pdf
- S36\_AlphabetArrayCZctEN 88.pdf
- S37\_AlphabetArrayCZctEN 89.pdf
- S38\_AlphabetArrayCZctEN 90.pdf
- S3\_EASI\_CZctEN 3.pdf
- S4\_EASI\_CZctEN 4.pdf
- S5\_EASI\_CZctEN 5.pdf
- S6\_EASI\_CZctEN 6.pdf
- S7\_EASI\_CZctEN 7.pdf
- S8\_EASI\_CZctEN 9.pdf
- S9\_EASI\_CZctEN 10.pdf

The copyright of individual parts of the supplement might differ from the CC BY 3.0 License.
