# Supplementary material for: Data quality control and tools in passive seismic experiments exemplified on the Czech broadband seismic pool MOBNET in the AlpArray collaborative project
Source: Copernicus journal article supplement (doi:10.5194/gi-6-505-2017), 2017-12-04
Supplement: Supplementary file 2 [file gi-6-505-2017-supplement.zip]

Archive with 39 entries (39 files):
- S16_EASI_CZctEN 17.pdf
- S34_AlpArrayCZctEN 86.pdf
- S35_AlpArrayCZctEN 87.pdf
- S3_EASI_CZctEN 3.pdf
- S7_EASI_CZctEN 7.pdf
- S2_EASI_CZctEN 2.pdf
- S11_EASI_CZctEN 12.pdf
- S29_AlpArrayCZctEN 81.pdf
- S17_EASI_CZctEN 18.pdf
- S24_AlpArrayCZctEN 75.pdf
- S8_EASI_CZctEN 9.pdf
- S33_AlpArrayCZctEN 85.pdf
- S23_AlpArrayCZctEN 74.pdf
- S26_AlpArrayCZctEN 78.pdf
- S4_EASI_CZctEN 4.pdf
- S18_EASI_CZctEN 19.pdf
- S10_EASI_CZctEN 11.pdf
- S38_AlpArrayCZctEN 90.pdf
- S9_EASI_CZctEN 10.pdf
- S14_EASI_CZctEN 15.pdf
- S12_EASI_CZctEN 13.pdf
- S15_EASI_CZctEN 16.pdf
- S28_AlpArrayCZctEN 80.pdf
- gi-6-505-2017-supplement-title-page.pdf
- S32_AlpArrayCZctEN 84.pdf
- S20_AlpArrayCZctEN 71.pdf
- S6_EASI_CZctEN 6.pdf
- S36_AlpArrayCZctEN 88.pdf
- S37_AlpArrayCZctEN 89.pdf
- S25_AlpArrayCZctEN 77.pdf
- S22_AlpArrayCZctEN 73.pdf
- S5_EASI_CZctEN 5.pdf
- S1_EASI_CZctEN 1.pdf
- S27_AlpArrayCZctEN 79.pdf
- S31_AlpArrayCZctEN 83.pdf
- S30_AlpArrayCZctEN 82.pdf
- S19_EASI_CZctEN 20.pdf
- S13_EASI_CZctEN 14.pdf
- S21_AlpArrayCZctEN 72.pdf
